# Supplementary material for: Virus Satellites Drive Viral Evolution and Ecology
Source: PubMed Central journal article supplement (PMC4619825; doi:10.1371/journal.pgen.1005609), 2015-10-23

# Dut (SaPIbov1 inducer)

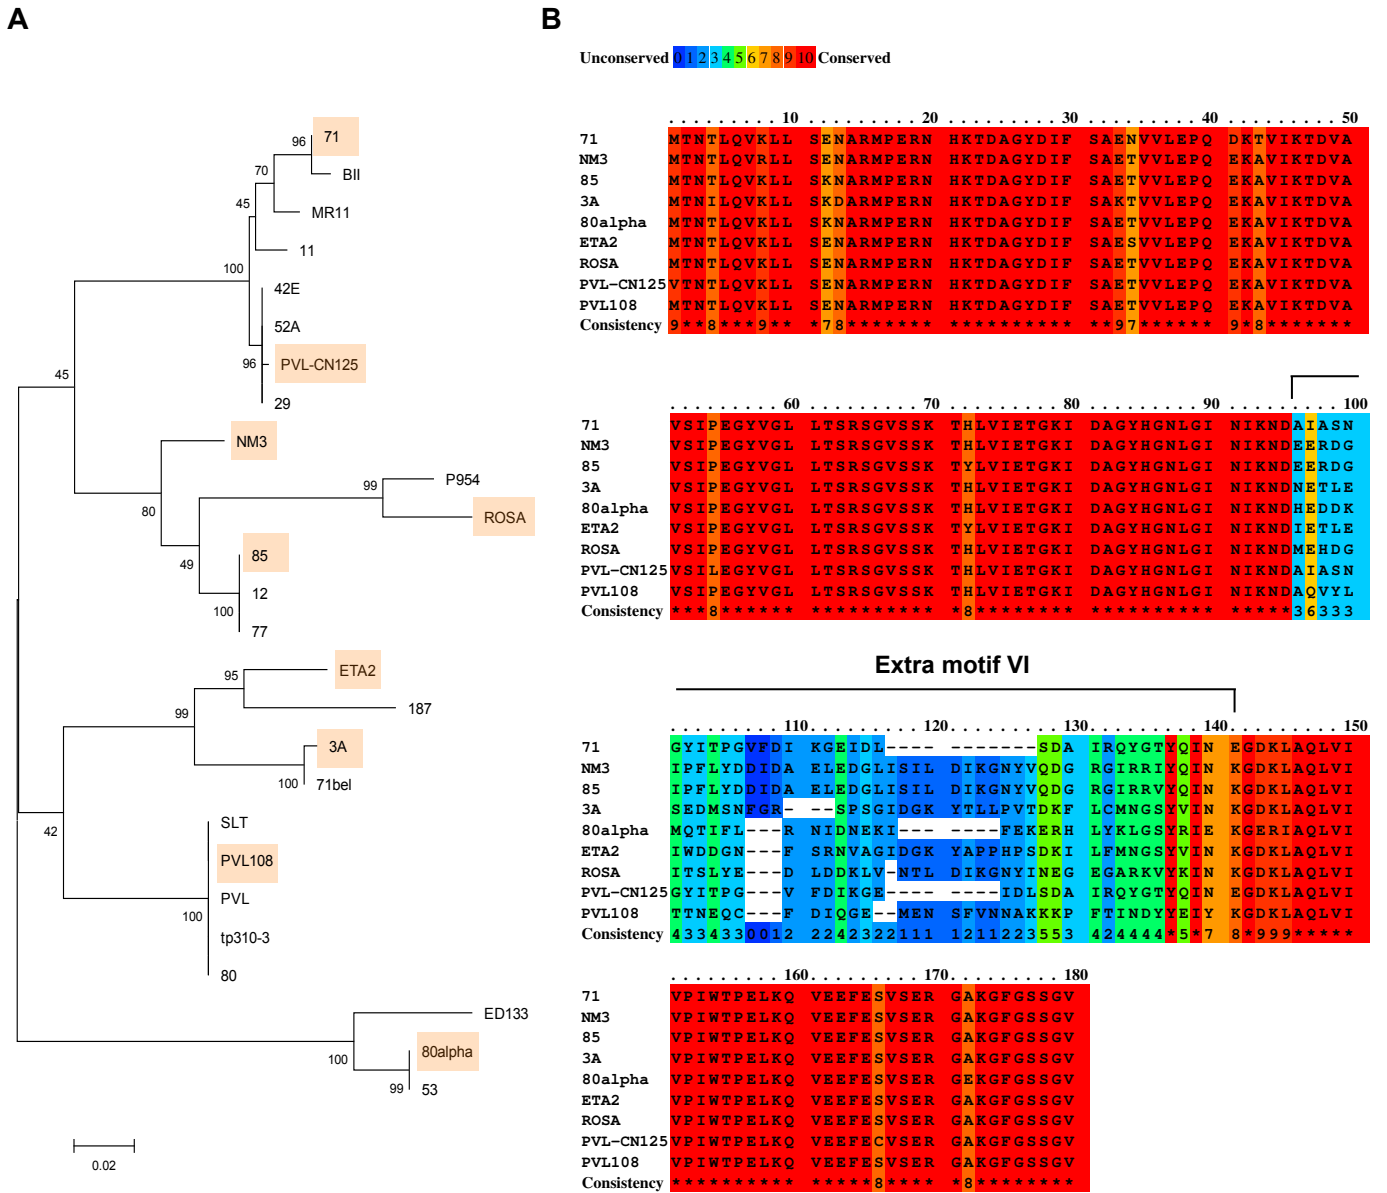

Sri (SaPI1 inducer)

C

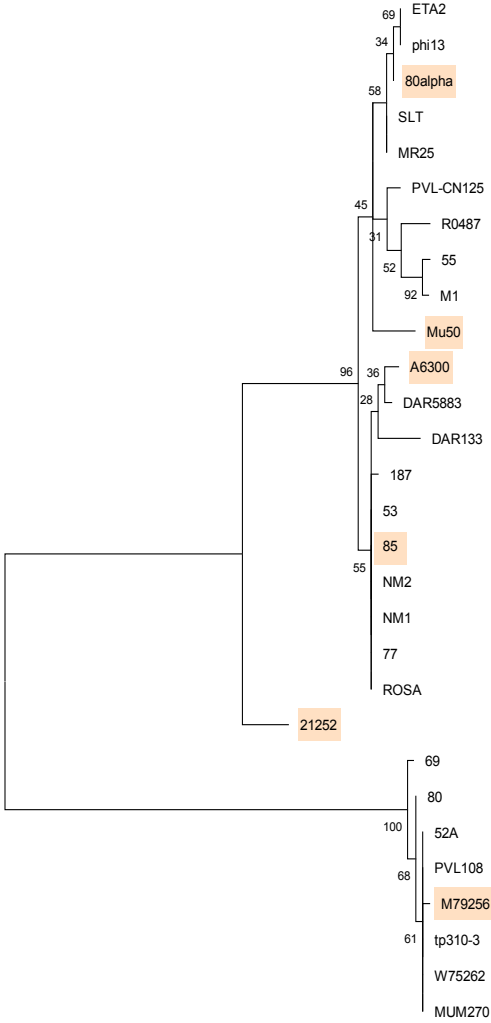

D

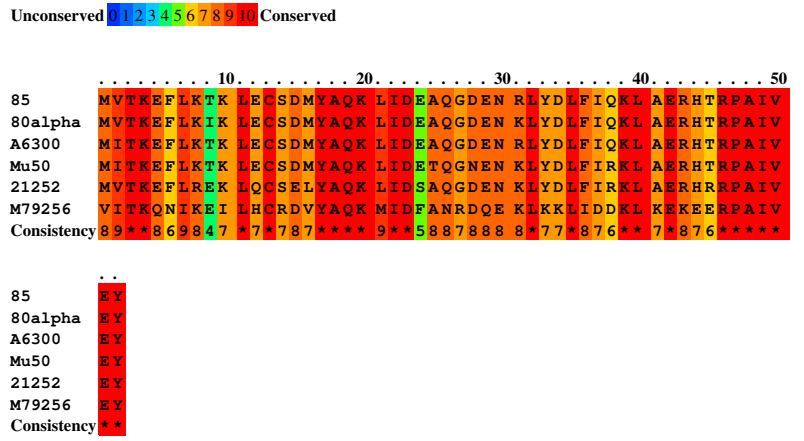

# SaPIbov2 inducer

E

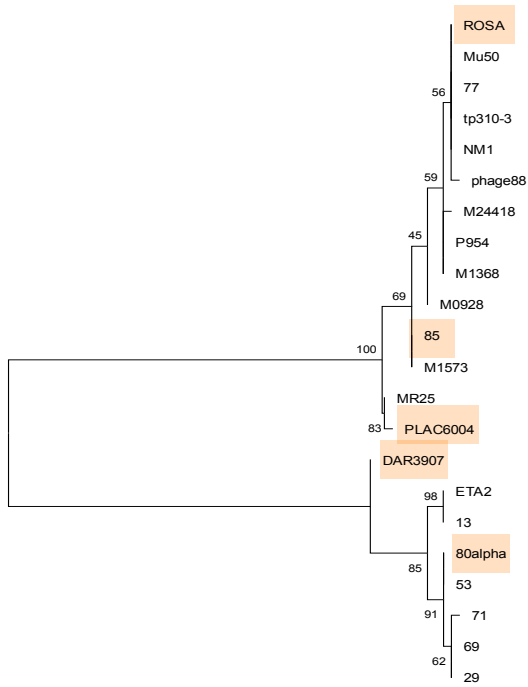

F

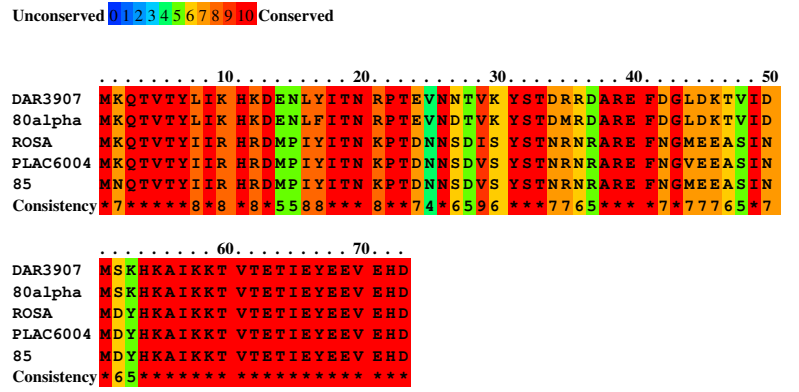

Supplement: pgen.1005609.s001.pdf [file pgen.1005609.s001.pdf]
