# Supplementary material for: Virus Satellites Drive Viral Evolution and Ecology
Source: PubMed Central journal article supplement (PMC4619825; doi:10.1371/journal.pgen.1005609), 2015-10-23

Phage 80α

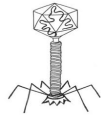

Evolved phages

SaPIbov1 +

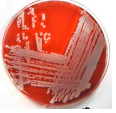

SaPI-negative

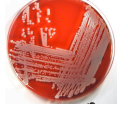

SaPIbov2 +

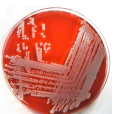

SaPI1 +

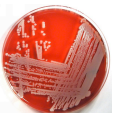

Phage sequencing

Phage sequencing

Phage sequencing

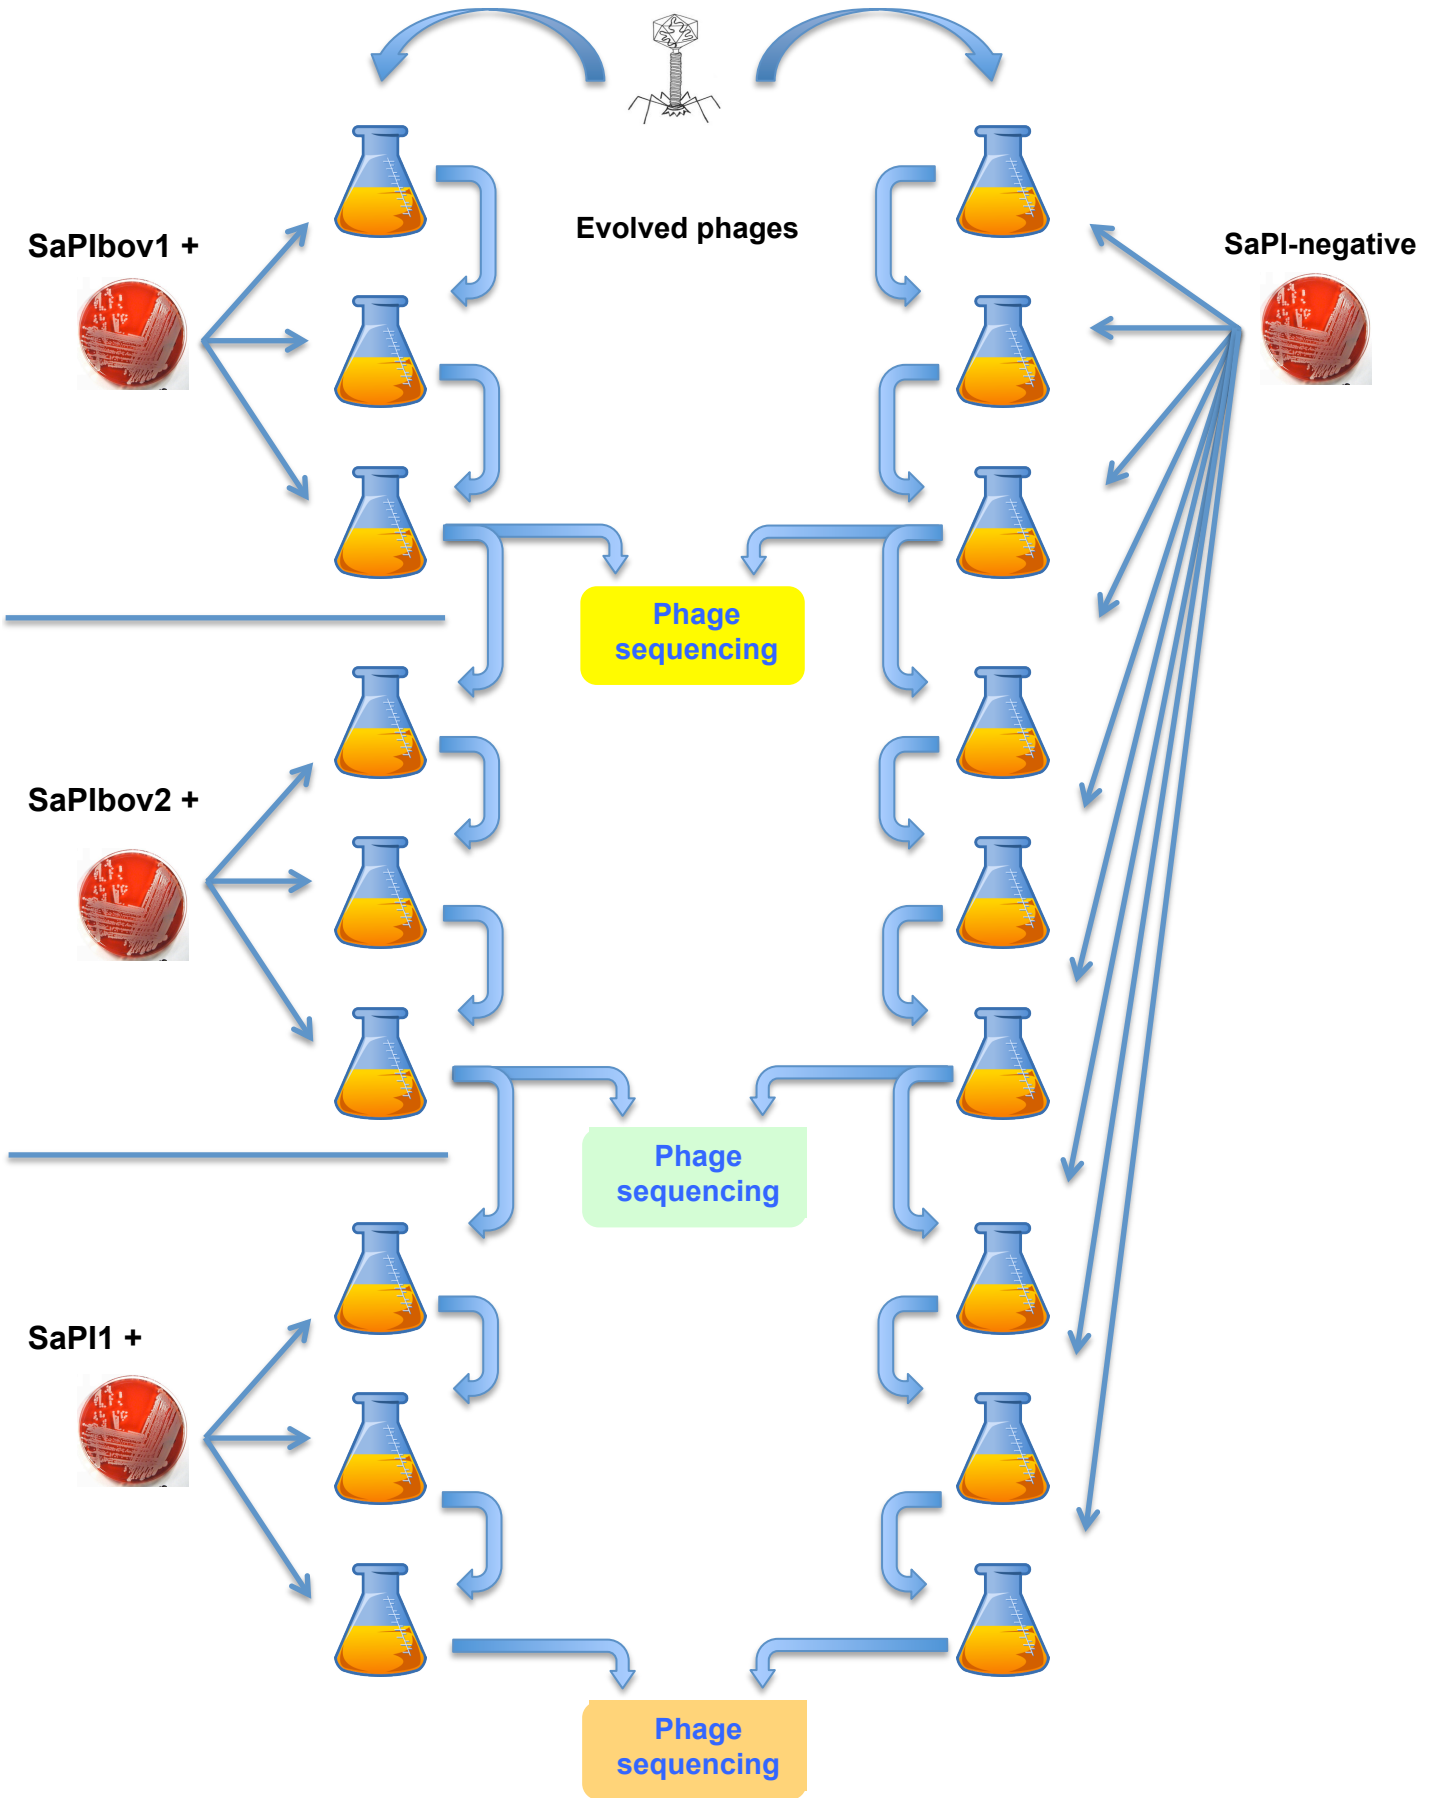

Supplement: pgen.1005609.s002.pdf [file pgen.1005609.s002.pdf]
