# Supplementary material for: Virus Satellites Drive Viral Evolution and Ecology
Source: PubMed Central journal article supplement (PMC4619825; doi:10.1371/journal.pgen.1005609), 2015-10-23
Supplement: pgen.1005609.s003.pdf [file pgen.1005609.s003.pdf]

## B Dut

|             |                                                         |            |                                                         |             |          |             |             |            |            |           |                       |
|-------------|---------------------------------------------------------|------------|---------------------------------------------------------|-------------|----------|-------------|-------------|------------|------------|-----------|-----------------------|
| SLT         | 10                                                      | 20         | 30                                                      | 40          | 50       | 2638A       | 10          | 20         | 30         | 40        | 50                    |
| 187         | MTNTLQVKLL SENARMPERN HKT DAGYDIF SAETVVLEPQ EKAVIKTDVA | 12         | MTNTLQVKLL SKNARMPERN HKT DAGYDIF SAETVVLEPQ EKAVIKTDVA |             |          |             |             |            |            |           |                       |
| Consistency | *****                                                   | *****      | *****                                                   | *****       | *****    | Consistency | *3*****8*** | *3**3*5*4  | 3          | *****6**6 | 6***** **6*3**8*      |
| SLT         | 60                                                      | 70         | 80                                                      | 90          | 100      | 2638A       | 60          | 70         | 80         | 90        | 100                   |
| 187         | VSIFEGYVGL LTRSRSVSSK THLVIETGKI DAGYHG NGLI NIKNDAQVYL | 12         | VSIFEGYVGL LTRSRSVSSK THLVIETGKI DAGYHG NGLI NIKNDEERDG |             |          |             |             |            |            |           |                       |
| Consistency | **3*****                                                | *****      | *****                                                   | **3*****    | **62431  | Consistency | *5*5*****   | *****      | *5*****    | ***3*472* | *****21402            |
| SLT         | 110                                                     | 120        | 130                                                     | 140         | 150      | 2638A       | 110         | 120        | 130        | 140       | 150                   |
| 187         | NTNEQCF--D TQGMENSVF NNAKKX PFTI NDYVEIYKGD KLAQLVIVPI  | 12         | IFFLYDDIDA ELEDGLISIL DIKKNYVQDG RGRIRRYVQIN KGRKLAQLVI |             |          |             |             |            |            |           |                       |
| Consistency | *411330*005                                             | 83*1124222 | 11533*1425                                              | *32*2*1**   | *****    | Consistency | *011231132  | 20611033   | 3          | 583*4233  | 2 10142**5** **6***** |
| SLT         | 160                                                     | 170        | 180                                                     | 2638A       | 160      | 170         | 180         |            |            |           |                       |
| 187         | WTPELKQVEE FESVSRGAK GFGSSGV                            | 12         | VPIWTPPEIQ VEEFESVSR GAKGFGSSGV                         |             |          |             |             |            |            |           |                       |
| Consistency | *****                                                   | *****      | *****                                                   | Consistency | *****5*  | *****6      | 2*3*        | 3*****3    |            |           |                       |
| 29          | 10                                                      | 20         | 30                                                      | 40          | 50       | PVL-CN125   | 10          | 20         | 30         | 40        | 50                    |
| ROSA        | MTNTLQVKLL SENARMPERN HKT DAGYDIF SAETVVLEPQ EKAVIKTDVA | tp310-3    | MTNTLQVKLL SENARMPERN HKT DAGYDIF SAETVVLEPQ EKAVIKTDVA |             |          |             |             |            |            |           |                       |
| Consistency | *****                                                   | *****      | *****                                                   | *****       | *****    | Consistency | *****       | *****      | *****      | *****     | *****                 |
| 29          | 60                                                      | 70         | 80                                                      | 90          | 100      | PVL-CN125   | 60          | 70         | 80         | 90        | 100                   |
| ROSA        | VSIFEGYVGL LTRSRSVSSK THLVIETGKI DAGYHG NGLI NIKNDAIASN | tp310-3    | VSIFEGYVGL LTRSRSVSSK THLVIETGKI DAGYHG NGLI NIKNDAQVYL |             |          |             |             |            |            |           |                       |
| Consistency | *****                                                   | *****      | *****                                                   | *****       | ***31244 | Consistency | *****       | *****      | *****      | *****     | *****1521             |
| 29          | 110                                                     | 120        | 130                                                     | 140         | 150      | PVL-CN125   | 110         | 120        | 130        | 140       | 150                   |
| ROSA        | GYITPGVFDI KGF----- IDLSDAIRQY GTYQINEGDK LAQLVIVPIW    | tp310-3    | TTNEQCFDIQ GEMENSVFNN AKRKPFTIND YVEIYKGDKL AQLVIVPIWT  |             |          |             |             |            |            |           |                       |
| Consistency | 02230214*1                                              | 020000000  | 1075641232                                              | 24*5*5**    | *****    | Consistency | *2113003111 | 2211522100 | 0000343113 | 2*6*15**  | *****                 |
| 29          | 160                                                     | 170        | PVL-CN125                                               | 160         | 170      |             |             |            |            |           |                       |
| ROSA        | TPELKQVEEF ECVSERGAK GFGSSGV                            | tp310-3    | PELKQVEEFE SVSERGAKGF GSSGV                             |             |          |             |             |            |            |           |                       |
| Consistency | *****                                                   | *2*****    | *****                                                   | Consistency | *****    | 2*****      | *****       |            |            |           |                       |

## Sri

|             |                                                           |        |                                                          |            |             |
|-------------|-----------------------------------------------------------|--------|----------------------------------------------------------|------------|-------------|
| 52A         | 10                                                        | 20     | 30                                                       | 40         | 50          |
| 55          | MVITKQNIKE ILHCRD VYAQ KMIDFANGDQ EKLKLLIDDK LKEREERPAI   | -      | MITKEFLKT KLECS D VYAQ KLIDEA QGDE NKLYNLFIQK LAERHTRPAI |            |             |
| Consistency | 05*****617*31*3*                                          | 3***** | *7*1*4**6                                                | 4**24*414* | *3*633***   |
| tp310-3     | 10                                                        | 20     | 30                                                       | 40         | 50          |
| PVL-CN125   | VITKQNIKEI ILCRD VYAQ KMIDFANGDQ EKLKLLIDDK LKEREERPAIVEY |        |                                                          |            |             |
| Consistency | 58**617*31*3*                                             | 5***** | 7**1*4**64                                               | **23*414*  | 3*633***8** |

## SaPIbov2

|             |                                                                                       |            |            |            |             |            |                  |
|-------------|---------------------------------------------------------------------------------------|------------|------------|------------|-------------|------------|------------------|
| EW          | 10                                                                                    | 20         | 30         | 40         | 50          | 60         | 70               |
| PH15        | -MKTIVTYFY KHKDL--DLY ITNRP TDANP TIKYSTDKRD ARKFDG TEDV LIDTSAHEIY KHTHTETDEI ERVEL- |            |            |            |             |            |                  |
| 37          | MPRQTVTYLI KITDT--NLY VTNRPTEQNT TIKYSTSRSD AREFNGMEDAAVDMTFHTAI KKTVTETTEY EEVAYD    |            |            |            |             |            |                  |
| Consistency | 04*45***65                                                                            | *35*3006** | 9**7*65463 | 356**56754 | **7*3*4**44 | 9*572*355  | *554***5*5*6*553 |
| 29          | 10                                                                                    | 20         | 30         | 40         | 50          | 60         | 70               |
| ROSA        | MKQTVTYLTK HKDENL FITN RPTEVNDTVK YSTD MRDARE FDGLDKTVID MSKHKAIKKT VTETIEYEEV EHD    |            |            |            |             |            |                  |
| Consistency | *****7*6                                                                              | *6*2176*** | 6**61*4384 | ***5342*** | *5*76542*   | *5*42***** | *****            |
| MR25        | 10                                                                                    | 20         | 30         | 40         | 50          | 60         | 70               |
| ETA2_       | MKQTVTYIIR HRDMP IYITN KPTDNNSDVS YSTNRRRARE FNGMEEASIN MDYHKAIKKT VTETIEYEEV EHD     |            |            |            |             |            |                  |
| Consistency | *****7*6                                                                              | *6*2176*** | 6**61*43*4 | ***5342*** | *5*76542*   | *5*42***** | *****            |
