# Supplementary material for: Virus Satellites Drive Viral Evolution and Ecology
Source: PubMed Central journal article supplement (PMC4619825; doi:10.1371/journal.pgen.1005609), 2015-10-23

### Enzymatic activity

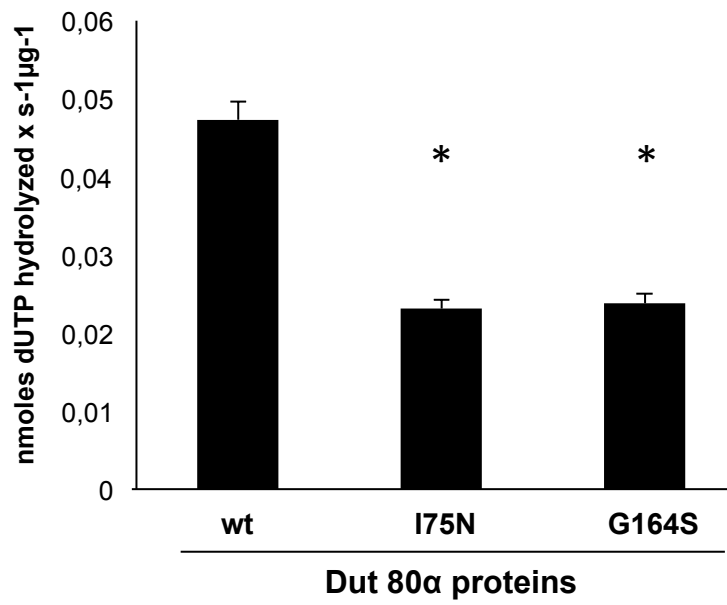

Supplement: pgen.1005609.s004.pdf [file pgen.1005609.s004.pdf]
