# Supplementary material for: Virus Satellites Drive Viral Evolution and Ecology
Source: PubMed Central journal article supplement (PMC4619825; doi:10.1371/journal.pgen.1005609), 2015-10-23
Supplement: pgen.1005609.s005.pdf [file pgen.1005609.s005.pdf]

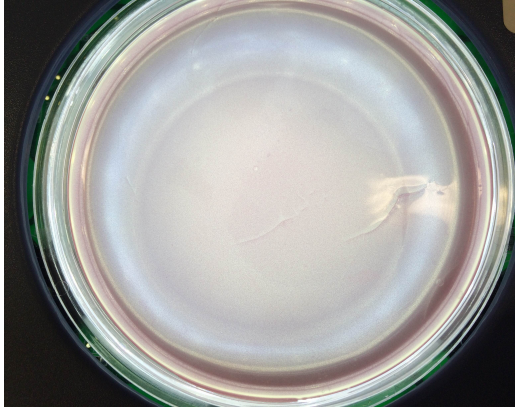

**EfsCIV583-positive**

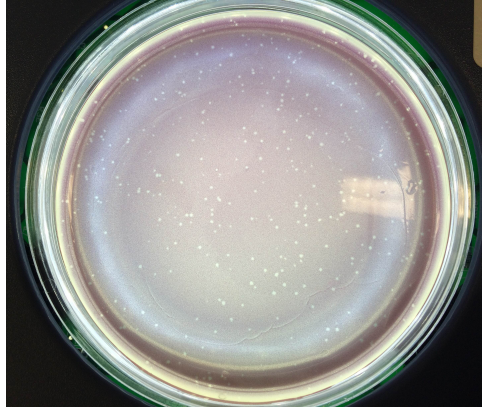

**EfsCIV583-negative**
