# Supplementary material for: Virus Satellites Drive Viral Evolution and Ecology
Source: PubMed Central journal article supplement (PMC4619825; doi:10.1371/journal.pgen.1005609), 2015-10-23
Supplement: pgen.1005609.s006.pdf [file pgen.1005609.s006.pdf]

**Staphylococcus aureus**

| Duts <sup>b</sup> | 80α               | φROSA             | φ71               | φETA2             | φPVL108           | φNM3              | φ85               | φ3A               | φPVL-CN125 |
|-------------------|-------------------|-------------------|-------------------|-------------------|-------------------|-------------------|-------------------|-------------------|------------|
| 80α               | 0                 |                   |                   |                   |                   |                   |                   |                   |            |
| φROSA             | -0,232<br>(0,076) | 0                 |                   |                   |                   |                   |                   |                   |            |
| φ71               | -0,161<br>(0,064) | -0,210<br>(0,062) | 0                 |                   |                   |                   |                   |                   |            |
| φETA2             | -0,136<br>(0,058) | -0,156<br>(0,059) | -0,113<br>(0,053) | 0                 |                   |                   |                   |                   |            |
| φPVL108           | -0,151<br>(0,063) | -0,178<br>(0,057) | -0,097<br>(0,044) | -0,040<br>(0,044) | 0                 |                   |                   |                   |            |
| φNM3              | -0,179<br>(0,073) | -0,218<br>(0,058) | -0,144<br>(0,053) | -0,150<br>(0,054) | -0,113<br>(0,045) | 0                 |                   |                   |            |
| φ85               | -0,043<br>(0,045) | -0,253<br>(0,065) | -0,141<br>(0,057) | -0,047<br>(0,038) | -0,111<br>(0,049) | -0,153<br>(0,040) | 0                 |                   |            |
| φ3A               | -0,269<br>(0,078) | -0,190<br>(0,070) | -0,120<br>(0,055) | -0,130<br>(0,049) | -0,006<br>(0,037) | -0,176<br>(0,063) | -0,192<br>(0,068) | 0                 |            |
| φPVL-CN125        | -0,157<br>(0,064) | -0,206<br>(0,060) | -0,065<br>(0,028) | -0,094<br>(0,051) | -0,061<br>(0,040) | -0,082<br>(0,045) | -0,10<br>(0,051)  | -0,116<br>(0,056) | 0          |

| SaPIbov2 <sup>c</sup> | φROSA          | φ85            | 80α            | DAR3907        | PLAC6004 |
|-----------------------|----------------|----------------|----------------|----------------|----------|
| φROSA                 | 0              |                |                |                |          |
| φ85                   | -0,011 (0,025) | 0              |                |                |          |
| 80α                   | -0,590 (0,300) | -0,552 (0,282) | 0              |                |          |
| DAR3907               | -0,631 (0,300) | -0,593 (0,280) | -0,128 (0,064) | 0              |          |
| PLAC6004              | -0,084 (0,054) | -0,059 (0,045) | -0,581 (0,287) | -0,621 (0,282) | 0        |

| Sri <sup>d</sup> | A6300          | Mu50           | φ85            | 21252          | M79256         | 80α            | φ55 |
|------------------|----------------|----------------|----------------|----------------|----------------|----------------|-----|
| A6300            | 0              |                |                |                |                |                |     |
| Mu50             | -0,098 (0,069) | 0              |                |                |                |                |     |
| φ85              | -0,089 (0,056) | -0,125 (0,087) | 0              |                |                |                |     |
| 21252            | -0,372 (0,190) | -0,363 (0,199) | -0,224 (0,132) | 0              |                |                |     |
| M79256           | -1,284 (0,684) | -1,017 (0,627) | -0,740 (0,549) | -0,541 (0,472) | 0              |                |     |
| 80α              | -0,186 (0,094) | -0,090 (0,076) | -0,154 (0,090) | -0,287 (0,161) | -1,148 (0,666) | 0              |     |
| φ55              | -0,223 (0,111) | -0,124 (0,089) | -0,256 (0,134) | -0,460 (0,239) | -0,800 (0,587) | -0,136 (0,088) | 0   |

**Enterococcus faecalis**

| <i>E. faecalis</i> <sup>e</sup> | EF0309         | Ef11           | X98            | VC1B-1 |
|---------------------------------|----------------|----------------|----------------|--------|
| EF0309                          | 0              |                |                |        |
| Ef11                            | -0,016 (0,346) | 0              |                |        |
| X98                             | 0,115 (0,294)  | -0,028 (0,029) | 0              |        |
| VC1B-1                          | -0,115 (0,493) | -1,085 (0,444) | -1,128 (0,468) | 0      |

<sup>a</sup>The difference between the nonsynonymous and synonymous distances per site from between sequences are shown. Standard error estimate(s) are shown in parenthesis. Analyses were conducted using the modified Nei-Gojobori (assumed transition/transversion bias = 2) model [1]. Evolutionary analyses were conducted in MEGA5 [2].

<sup>b</sup>Accession numbers Dut proteins: 80α (YP\_001285346); φRosa (YP\_240373); φ71 (YP\_240446); φETA2 (YP\_001004294); φPVL108 (YP\_918921); φNM3 (YP\_908820); φ85 (YP\_239795); φ3A (YP\_239989); φPVL-CN125 (YP\_002939700).

<sup>c</sup>Accession numbers SaPIbov2 inducers: φROSA (YP\_240350); φ85 (YP\_239776); 80α (YP\_001285329); Strain DAR390 (EXY00034); Strain PLAC6004 (EVF70071).

<sup>d</sup>Accession numbers Sri proteins: Strain A6300 (EEV76885); Strain Mu50 (BAB57032); φ85 (YP\_239784); Strain 21252 (EHO92899); Strain M79256 (EXP87181); φ80α (YP\_001285336); φ55 (YP\_240514).

<sup>e</sup>Accession numbers EfCl<sub>v583</sub> inducer proteins: EF0309 (AAO80172); Ef11 (YP\_003358829); X98 (WP\_002381619); VC1B-1(EPI33180).
