# Supplementary material for: Virus Satellites Drive Viral Evolution and Ecology
Source: PubMed Central journal article supplement (PMC4619825; doi:10.1371/journal.pgen.1005609), 2015-10-23
Supplement: pgen.1005609.s007.pdf [file pgen.1005609.s007.pdf]

## Infection SaPIbov1-positive strain

| Replica | Sequenced phage | <i>dut</i> (SaPIbov1 inducer)            | ORF15 (SaPIbov2 inducer) | <i>sri</i> (SaPI1 inducer) |
|---------|-----------------|------------------------------------------|--------------------------|----------------------------|
| 1       | 1               | S63I (AGT / ATT)                         | wt                       | wt                         |
| 1       | 2               | S63I (AGT / ATT)                         | wt                       | wt                         |
| 1       | 3               | S63I (AGT / ATT)                         | wt                       | wt                         |
| 1       | 4               | S63I (AGT / ATT)                         | wt                       | wt                         |
| 1       | 5               | A deleted from position 13926            | wt                       | wt                         |
| 1       | 6               | S63I (AGT / ATT)                         | wt                       | wt                         |
| 1       | 7               | S63I (AGT / ATT)                         | wt                       | wt                         |
| 1       | 8               | S63I (AGT / ATT)                         | wt                       | wt                         |
| 1       | 9               | S63I (AGT / ATT)                         | wt                       | wt                         |
| 1       | 10              | S63I (AGT / ATT)                         | wt                       | wt                         |
| 1       | 11              | S63I (AGT / ATT)                         | wt                       | wt                         |
| 1       | 12              | S63I (AGT / ATT)                         | wt                       | wt                         |
| 1       | 13              | S63I (AGT / ATT)                         | wt                       | wt                         |
| 1       | 14              | S63I (AGT / ATT)                         | wt                       | wt                         |
| 1       | 15              | S63I (AGT / ATT)                         | wt                       | wt                         |
| 1       | 16              | S63I (AGT / ATT)                         | wt                       | wt                         |
| 1       | 17              | S63I (AGT / ATT)                         | wt                       | wt                         |
| 1       | 18              | S63I (AGT / ATT)                         | wt                       | wt                         |
| 1       | 19              | P17S (CCC / TCC)                         | wt                       | wt                         |
| 1       | 20              | S63I (AGT / ATT)                         | wt                       | wt                         |
| 2       | 1               | E155* (GAA / TAA)                        | wt                       | wt                         |
| 2       | 2               | E155* (GAA / TAA)                        | wt                       | wt                         |
| 2       | 3               | E155* (GAA / TAA)                        | wt                       | wt                         |
| 2       | 4               | I75N (ATT / AAT)                         | wt                       | wt                         |
| 2       | 5               | I75N (ATT / AAT)                         | wt                       | wt                         |
| 2       | 6               | I75N (ATT / AAT)                         | wt                       | wt                         |
| 2       | 7               | E155* (GAA / TAA)                        | wt                       | wt                         |
| 2       | 8               | E155* (GAA / TAA)                        | wt                       | wt                         |
| 2       | 9               | E155* (GAA / TAA)                        | wt                       | wt                         |
| 2       | 10              | E155* (GAA / TAA)                        | wt                       | wt                         |
| 2       | 11              | E155* (GAA / TAA)                        | wt                       | wt                         |
| 2       | 12              | E155* (GAA / TAA)                        | wt                       | wt                         |
| 2       | 13              | E155* (GAA / TAA)                        | wt                       | wt                         |
| 2       | 14              | I75N (ATT / AAT)                         | wt                       | wt                         |
| 2       | 15              | E155* (GAA / TAA)                        | wt                       | wt                         |
| 2       | 16              | E155* (GAA / TAA)                        | wt                       | wt                         |
| 2       | 17              | E155* (GAA / TAA)                        | wt                       | wt                         |
| 2       | 18              | E155* (GAA / TAA)                        | wt                       | wt                         |
| 2       | 19              | E155* (GAA / TAA)                        | wt                       | wt                         |
| 2       | 20              | I75N (ATT / AAT)                         | wt                       | wt                         |
| 3       | 1               | I53M (ATA / ATG)                         | wt                       | wt                         |
| 3       | 2               | A25E (GCA / GAA)                         | wt                       | wt                         |
| 3       | 3               | S68I (AGT / ATT)                         | wt                       | wt                         |
| 3       | 4               | E133* (GAA / TAA)                        | wt                       | wt                         |
| 3       | 5               | D24N (GAT / AAT)                         | wt                       | wt                         |
| 3       | 6               | E162* (GAA / TAA)                        | wt                       | wt                         |
| 3       | 7               | R134C (CGT / TGT)                        | wt                       | wt                         |
| 3       | 8               | R15I (AGA / ATA)                         | wt                       | wt                         |
| 3       | 9               | M101K (ATG / AAG)                        | wt                       | wt                         |
| 3       | 10              | A136E (GCA / GAA)                        | wt                       | wt                         |
| 3       | 11              | W144R (TGG / CGG)                        | wt                       | wt                         |
| 3       | 12              | G164D (GGC / GAC)                        | wt                       | wt                         |
| 3       | 13              | W144R (TGG / CGG)                        | wt                       | wt                         |
| 3       | 14              | R15G (AGA / GGA)                         | wt                       | wt                         |
| 3       | 15              | R15I (AGA / ATA)                         | wt                       | wt                         |
| 3       | 16              | G26V (GGT / GTT)                         | wt                       | wt                         |
| 3       | 17              | G59V ( GGA / GTA)                        | wt                       | wt                         |
| 3       | 18              | G89E (GGG / GAG)                         | wt                       | wt                         |
| 3       | 19              | G56V (GGC / GTC)                         | wt                       | wt                         |
| 3       | 20              | W144R (TGG / CGG) / V151W<br>(GTG / TGG) | wt                       | wt                         |

Infection SaPIbov2-positive strain

| Replica | Sequenced phage | <i>dut</i> (SaPIbov1 inducer)                    | ORF15 (SaPIbov2 inducer)     | <i>sri</i> (SaPI1 inducer) |
|---------|-----------------|--------------------------------------------------|------------------------------|----------------------------|
| 1       | 1               | E133* (GAA / TAA)                                | T deleted from position 6611 | wt                         |
| 1       | 2               | A deleted from position 14233                    | A38E (GCA /GAA)              | wt                         |
| 1       | 3               | E133* (GAA / TAA)                                | T deleted from position 6611 | wt                         |
| 1       | 4               | S63I (AGT / ATT)                                 | T deleted from position 6611 | wt                         |
| 1       | 5               | E133* (GAA / TAA)                                | T deleted from position 6611 | wt                         |
| 1       | 6               | E133* (GAA / TAA)                                | T deleted from position 6611 | wt                         |
| 1       | 7               | S63I (AGT / ATT)                                 | A inserted in position 6636  | wt                         |
| 1       | 8               | E133* (GAA / TAA)                                | T deleted from position 6611 | wt                         |
| 1       | 9               | S63I (AGT / ATT)                                 | A38E (GCA /GAA)              | wt                         |
| 1       | 10              | E133* (GAA / TAA)                                | T deleted from position 6611 | wt                         |
| 1       | 11              | S63I (AGT / ATT)                                 | A38E (GCA /GAA)              | wt                         |
| 1       | 12              | S63I (AGT / ATT)                                 | S32* (TCA / TAA)             | wt                         |
| 1       | 13              | S63I (AGT / ATT)                                 | A38E (GCA /GAA)              | wt                         |
| 1       | 14              | S63I (AGT / ATT)                                 | S32* (TCA / TAA)             | wt                         |
| 1       | 15              | S63I (AGT / ATT) + A deleted from position 14233 | E63* (GAA / TAA)             | wt                         |
| 1       | 16              | E133* (GAA / TAA)                                | T deleted from position 6611 | wt                         |
| 1       | 17              | S63I (AGT / ATT)                                 | T deleted from position 6611 | wt                         |
| 1       | 18              | S63I (AGT / ATT)                                 | S32* (TCA / TAA)             | wt                         |
| 1       | 19              | S63I (AGT / ATT)                                 | A38E (GCA /GAA)              | wt                         |
| 1       | 20              | S63I (AGT / ATT)                                 | S32P (TCA / CCA)             | wt                         |
| 2       | 1               | I75N (ATT / AAT)                                 | T62P (ACA /CCA)              | wt                         |
| 2       | 2               | I75N (ATT / AAT)                                 | T62P (ACA /CCA)              | wt                         |
| 2       | 3               | I75N (ATT / AAT)                                 | Q3* (CAG / TAG)              | wt                         |
| 2       | 4               | I75N (ATT / AAT)                                 | Q3* (CAG / TAG)              | wt                         |
| 2       | 5               | I75N (ATT / AAT)                                 | T62P (ACA /CCA)              | wt                         |
| 2       | 6               | I75N (ATT / AAT)                                 | T62P (ACA /CCA)              | wt                         |
| 2       | 7               | I75N (ATT / AAT)                                 | T62P (ACA /CCA)              | wt                         |
| 2       | 8               | I75N (ATT / AAT)                                 | Q3* (CAG / TAG)              | wt                         |
| 2       | 9               | I75N (ATT / AAT)                                 | Q3* (CAG / TAG)              | wt                         |
| 2       | 10              | I75N (ATT / AAT)                                 | T62P (ACA /CCA)              | wt                         |
| 2       | 11              | I75N (ATT / AAT)                                 | Q3* (CAG / TAG)              | wt                         |
| 2       | 12              | I75N (ATT / AAT)                                 | T62P (ACA /CCA)              | wt                         |
| 2       | 13              | I75N (ATT / AAT)                                 | T62P (ACA /CCA)              | wt                         |
| 2       | 14              | I75N (ATT / AAT)                                 | Q3* (CAG / TAG)              | wt                         |
| 2       | 15              | I75N (ATT / AAT)                                 | T62P (ACA /CCA)              | wt                         |
| 2       | 16              | I75N (ATT / AAT)                                 | T62P (ACA /CCA)              | wt                         |
| 2       | 17              | I75N (ATT / AAT)                                 | T62P (ACA /CCA)              | wt                         |
| 2       | 18              | I75N (ATT / AAT)                                 | Q3* (CAG / TAG)              | wt                         |
| 2       | 19              | I75N (ATT / AAT)                                 | T62P (ACA /CCA)              | wt                         |
| 2       | 20              | I75N (ATT / AAT)                                 | T62P (ACA /CCA)              | wt                         |
| 3       | 1               | M101K (ATG / AAG)                                | A38E (GCA / GAA)             | wt                         |
| 3       | 2               | M101K (ATG / AAG)                                | A38E (GCA / GAA)             | wt                         |
| 3       | 3               | A inserted in position 14383                     | E24* (GAA / TAA)             | wt                         |
| 3       | 4               | W144R (TGG / CGG)                                | A38E (GCA / GAA)             | wt                         |
| 3       | 5               | R15I R15I (AGA / ATA)                            | E40* (GAA / TAA)             | wt                         |
| 3       | 6               | M101K (ATG / AAG)                                | A38E (GCA / GAA)             | wt                         |
| 3       | 7               | E112K (GAA / AAA)                                | S32P (TCA / CCA)             | wt                         |
| 3       | 8               | C deleted from position 14054                    | wt                           | wt                         |
| 3       | 9               | M101K (ATG / AAG)                                | A38E (GCA / GAA)             | wt                         |
| 3       | 10              | M101K (ATG / AAG)                                | A38E (GCA / GAA)             | wt                         |
| 3       | 11              | R15I (AGA / ATA)                                 | E40* (GAA / TAA)             | wt                         |
| 3       | 12              | R15I (AGA / ATA)                                 | A38E (GCA / GAA)             | wt                         |
| 3       | 13              | I143T (ATA / ACA)                                | S32* (TCA / TAA)             | wt                         |
| 3       | 14              | R15I (AGA / ATA)                                 | E40* (GAA / TAA)             | wt                         |
| 3       | 15              | K79N (AAG / AAT)                                 | A38E (GCA / GAA)             | wt                         |
| 3       | 16              | I53T (ATA / ACA)                                 | A38E (GCA / GAA)             | wt                         |
| 3       | 17              | A50V (GCT / GTT)                                 | A38E (GCA / GAA)             | wt                         |
| 3       | 18              | G59R (GGA / CGA)                                 | E40* (GAA / TAA)             | wt                         |
| 3       | 19              | E130K ( GAA / AAA)                               | E40* (GAA / TAA)             | wt                         |
| 3       | 20              | A50V ( GCT / GTT)                                | T62P (ACA /CCA)              | wt                         |

## Infection SaPI1-positive strain

| Replica | Sequenced phage | <i>dut</i> (SaPIbov1 inducer)                        | ORF15 (SaPIbov2 inducer)              | <i>sri</i> (SaPI1 inducer)        |
|---------|-----------------|------------------------------------------------------|---------------------------------------|-----------------------------------|
| 1       | 1               | S63I (AGT / ATT)                                     | E63* (GAA / TAA)                      | Q19* (CAG / TAG)                  |
| 1       | 2               | E133* (GAA / TAA)                                    | T deleted from position 6611          | Y17H (TAC / CAC)                  |
| 1       | 3               | E133* (GAA / TAA)                                    | T deleted from position 6611          | A18D (GCT / GAT)                  |
| 1       | 4               | E133* (GAA / TAA)                                    | T deleted from position 6611          | Y17H (TAC / CAC)                  |
| 1       | 5               | E133* (GAA / TAA)                                    | wt                                    | G 10983A (ribosoma binding site)  |
| 1       | 6               | S63I (AGT / ATT)                                     | A inserted in position 6636           | L7S (TTG / TCG)                   |
| 1       | 7               | S63I (AGT / ATT)                                     | S32P (TCA / CCA)                      | Y17H (TAC / CAC)                  |
| 1       | 8               | P39L (CCA / CTA)                                     | T deleted from position 6611          | S14L (TCA / TTA)                  |
| 1       | 9               | S63I (AGT / ATT)                                     | Q3* (CAG / TAG)                       | C13R (TGT / CGT)                  |
| 1       | 10              | E133* (GAA / TAA)                                    | T deleted from position 6611          | A25E (GCA / GAA)                  |
| 1       | 11              | E133* (GAA / TAA)                                    | T deleted from position 6611          | T deleted from position 11011     |
| 1       | 12              | S63I (AGT / ATT)                                     | T deleted from position 6611          | S14* (TCA / TAA)                  |
| 1       | 13              | P39L (CCA / CTA)                                     | wt                                    | Y17H (TAC / CAC)                  |
| 1       | 14              | S63I (AGT / ATT)                                     | A inserted in position 6636           | A25E (GCA / GAA)                  |
| 1       | 15              | E133* (GAA / TAA)                                    | A38E (GCA / GAA)                      | S14* (TCA / TAA)                  |
| 1       | 16              | P39L (CCA / CTA)                                     | wt                                    | Y17H (TAC / CAC)                  |
| 1       | 17              | P39L (CCA / CTA)                                     | wt                                    | Y17H (TAC / CAC)                  |
| 1       | 18              | wt                                                   | S32P (TCA / CCA)                      | Y17H (TAC / CAC)                  |
| 1       | 19              | A32T (GCT / ACT)                                     | wt                                    | A18T (GCT / ACT)                  |
| 1       | 20              | S63I (AGT / ATT)                                     | A38E (GCA / GAA)                      | G 10983 A (ribosoma binding site) |
| 2       | 1               | I75N (ATT / AAT)                                     | Q3* (CAG / TAG)                       | E24* (GAG / TAG)                  |
| 2       | 2               | E55* (GAA / TAA)                                     | A38E (GCA / GAA)                      | C13F (TGT / TTT)                  |
| 2       | 3               | I75N (ATT / AAT)                                     | Q3* (CAG / TAG)                       | E24* (GAG / TAG)                  |
| 2       | 4               | I75N (ATT / AAT)                                     | Q3* (CAG / TAG)                       | several deletions                 |
| 2       | 5               | I75N (ATT / AAT)                                     | T62P (ACA / CCA)                      | T deleted from position 11040     |
| 2       | 6               | I75N (ATT / AAT)                                     | T62P (ACA / CCA)                      | A18D (GCT / GCA)                  |
| 2       | 7               | I75N (ATT / AAT)                                     | T62P (ACA / CCA)                      | G 10983 A (ribosoma binding site) |
| 2       | 8               | I75N (ATT / AAT)                                     | Q3* (CAG / TAG)                       | Y17H (TAC / CAC)                  |
| 2       | 9               | I75N (ATT / AAT)                                     | Q3* (CAG / TAG)                       | E24* (GAG / TAG)                  |
| 2       | 10              | I75N (ATT / AAT)                                     | Q3* (CAG / TAG)                       | E24* (GAG / TAG)                  |
| 2       | 11              | I75N (ATT / AAT)                                     | T62P (ACA / CCA)                      | G 10983 A (ribosoma binding site) |
| 2       | 12              | I75N (ATT / AAT)                                     | Q3* (CAG / TAG)                       | E24* (GAG / TAG)                  |
| 2       | 13              | I75N (ATT / AAT)                                     | T62P (ACA / CCA)                      | G 10983 A (ribosoma binding site) |
| 2       | 14              | I75N (ATT / AAT)                                     | Q3* (CAG / TAG)                       | E24* (GAG / TAG)                  |
| 2       | 15              | I75N (ATT / AAT)                                     | T62P (ACA / CCA)                      | G 10983 A (ribosoma binding site) |
| 2       | 16              | I75N (ATT / AAT)                                     | T62P (ACA / CCA)                      | G 10983 A (ribosoma binding site) |
| 2       | 17              | I75N (ATT / AAT)                                     | Q3* (CAG / TAG)                       | E24* (GAG / TAG)                  |
| 2       | 18              | I75N (ATT / AAT)                                     | T62P (ACA / CCA)                      | G 10983 A (ribosoma binding site) |
| 2       | 19              | I75N (ATT / AAT)                                     | T62P (ACA / CCA)                      | G 10983 A (ribosoma binding site) |
| 2       | 20              | I75N (ATT / AAT)                                     | Q3* (CAG / TAG)                       | E24* (GAG / TAG)                  |
| 3       | 1               | A inserted in position 13931                         | S32P (TCA / CCA)                      | E24* (GAG / TAG)                  |
| 3       | 2               | A inserted in position 13931                         | S32P (TCA / CCA)                      | E24*(GAG / TAG)                   |
| 3       | 3               | A inserted in position 13931, AGA insertion in 14195 | A38E (GCA / GAA)                      | Y17H (TAC / CAC)                  |
| 3       | 4               | R15I (AGA / ATA)                                     | A38E (GCA / GAA)                      | A deleted from 11062              |
| 3       | 5               | G164S (GGC / AGC)                                    | A38E (GCA / GAA)                      | C13Y (TGT / TAT)                  |
| 3       | 6               | I45S (ATC / AGC)                                     | S32P (TCA / CCA)                      | C13Y (TGT / TAT)                  |
| 3       | 7               | A32D (GCT / GAT) and E118* (GAA / TAA)               | E63* (GAA / TAA)                      | G 10983 A (ribosome binding site) |
| 3       | 8               | M101K (ATG / AAG) and G inserted in position 14096   | A38E (GCA / GAA)                      | A18D (GCT / GAT)                  |
| 3       | 9               | I53T (ATA / ACA)                                     | A38E (GCA / GAA)                      | L7S (TTG / TCG)                   |
| 3       | 10              | R15I (AGA / ATA)                                     | A38E (GCA / GAA)                      | A deleted from 11062              |
| 3       | 11              | V51L (GTG / TTG)                                     | 30DEL61                               | G deleted from 11025              |
| 3       | 12              | I53T (ATA / ACA)                                     | A38E (GCA / GAA)                      | T deleted from 11040              |
| 3       | 13              | wt                                                   | A38E (GCA / GAA)                      | C13Y (TGT / TAT)                  |
| 3       | 14              | G164S (GGC / AGC)                                    | E40* (GAA / TAA)                      | C13Y (TGT / TAT)                  |
| 3       | 15              | wt                                                   | A38E (GCA / GAA)                      | C13Y (TGT / TAT)                  |
| 3       | 16              | I45S (ATC / AGC)                                     | S32P (TCA / CCA) and E40* (GAA / TAA) | C13Y (TGT / TAT)                  |
| 3       | 17              | 133DEL164                                            | A38E (GCA / GAA)                      | Y17H (TAC / CAC)                  |
| 3       | 18              | 133DEL164                                            | A38E (GCA / GAA)                      | Y17H (TAC / CAC)                  |
| 3       | 19              | M101K (ATG / AAG)                                    | A38E (GCA / GAA)                      | A18D (GCT / GAT)                  |
| 3       | 20              | 133DEL164                                            | S32P (TCA / CCA)                      | C13Y (TGT / TAT)                  |
