# Supplementary material for: Virus Satellites Drive Viral Evolution and Ecology
Source: PubMed Central journal article supplement (PMC4619825; doi:10.1371/journal.pgen.1005609), 2015-10-23
Supplement: pgen.1005609.s008.pdf [file pgen.1005609.s008.pdf]

| 80α genotype                      | SaPI     | Phage titre <sup>b</sup> | SaPI titre <sup>c</sup> |
|-----------------------------------|----------|--------------------------|-------------------------|
| wt                                | -        | 3.1 x 10 <sup>10</sup>   | -                       |
| wt                                | SaPIbov1 | 4.6 x 10 <sup>8</sup>    | 5.2 x 10 <sup>7</sup>   |
| wt                                | SaPIbov2 | 3.4 x 10 <sup>7</sup>    | 1.1 x 10 <sup>8</sup>   |
| wt                                | SaPI1    | 1.5 x 10 <sup>8</sup>    | 1.7 x 10 <sup>8</sup>   |
| Dut I75N; ORF15 T62P; Sri G10983A | -        | 9.3 x 10 <sup>9</sup>    | -                       |
| Dut I75N; ORF15 T62P; Sri G10983A | SaPIbov1 | 8.6 x 10 <sup>9</sup>    | 4.7 x 10 <sup>2d</sup>  |
| Dut I75N; ORF15 T62P; Sri G10983A | SaPIbov2 | 9.4 x 10 <sup>9</sup>    | 9.7 x 10 <sup>2d</sup>  |
| Dut I75N; ORF15 T62P; Sri G10983A | SaPI1    | 1.1 x 10 <sup>10</sup>   | 1.7 x 10 <sup>2d</sup>  |
| Dut G164S; ORF15 E40*; Sri C13Y   | -        | 2.1 x 10 <sup>10</sup>   | -                       |
| Dut G164S; ORF15 E40*; Sri C13Y   | SaPIbov1 | 2.6 x 10 <sup>10</sup>   | 4.4 x 10 <sup>2d</sup>  |
| Dut G164S; ORF15 E40*; Sri C13Y   | SaPIbov2 | 1.1 x 10 <sup>10</sup>   | 1.4 x 10 <sup>3d</sup>  |
| Dut G164S; ORF15 E40*; Sri C13Y   | SaPI1    | 1.3 x 10 <sup>10</sup>   | 1.1 x 10 <sup>2d</sup>  |

<sup>a</sup>The means of results from three independent experiments are presented. Variation was within 5% in all cases.

<sup>b</sup>Plaques / ml of lysate, using RN4220 as indicator.

<sup>c</sup>Transductants / ml of lysate, using RN4220 as recipient.

<sup>d</sup>This frequency is typical of transfer by generalized transduction and is not SaPI-specific.
