# Supplementary material for: Virus Satellites Drive Viral Evolution and Ecology
Source: PubMed Central journal article supplement (PMC4619825; doi:10.1371/journal.pgen.1005609), 2015-10-23
Supplement: pgen.1005609.s009.pdf [file pgen.1005609.s009.pdf]

| Inducing Phage 80 $\alpha$                 | SaPI     | Branch | SaPI mutation <sup>a,b</sup>                                               |
|--------------------------------------------|----------|--------|----------------------------------------------------------------------------|
| Dut S63I, ORF15 A38E, <i>sri</i> G 10983 A | SaPIbov1 | 1      | A deleted from position 14611. StI mutant.                                 |
| Dut S63I, ORF15 A38E, <i>sri</i> G 10983 A | SaPIbov1 | 2      | A deleted from position 14119. StI mutant.                                 |
| Dut S63I, ORF15 A38E, <i>sri</i> G 10983 A | SaPIbov1 | 3      | StI M7I.                                                                   |
| Dut S63I, ORF15 A38E, <i>sri</i> G 10983 A | SaPIbov1 | 4      | A deleted from position 14303. StI mutant.                                 |
| Dut S63I, ORF15 A38E, <i>sri</i> G 10983 A | SaPIbov2 | 1      | Deletion in <i>stI</i> . Residues N122-K168 eliminated.                    |
| Dut S63I, ORF15 A38E, <i>sri</i> G 10983 A | SaPIbov2 | 2      | StI G110R.                                                                 |
| Dut S63I, ORF15 A38E, <i>sri</i> G 10983 A | SaPIbov2 | 3      | C-terminal mutation. The last K* is substituted by PES*.                   |
| Dut I75N, ORF15 Q3*, $\Delta$ <i>sri</i>   | SaPIbov1 | 1      | A deleted from position 14119. StI mutant.                                 |
| Dut I75N, ORF15 Q3*, $\Delta$ <i>sri</i>   | SaPIbov1 | 2      | StI Q150*. StI mutant.                                                     |
| Dut I75N, ORF15 Q3*, $\Delta$ <i>sri</i>   | SaPIbov1 | 3      | T inserted in position 14373. StI mutant.                                  |
| Dut I75N, ORF15 Q3*, $\Delta$ <i>sri</i>   | SaPIbov1 | 4      | A inserted in position 14454. StI mutant.                                  |
| Dut I75N, ORF15 Q3*, $\Delta$ <i>sri</i>   | SaPIbov2 | 1      | T deleted from position 23963 ( <i>stI</i> promoter region).               |
| Dut I75N, ORF15 Q3*, $\Delta$ <i>sri</i>   | SaPIbov2 | 2      | C-terminal mutation. The last EIDKYLK* residues are substituted by AQSKL*. |
| wt                                         | SaPIbov1 | 1      | No mutations.                                                              |
| wt                                         | SaPIbov1 | 2      | No mutations.                                                              |
| wt                                         | SaPIbov1 | 3      | No mutations.                                                              |
| wt                                         | SaPIbov1 | 4      | No mutations.                                                              |
| wt                                         | SaPIbov2 | 1      | No mutations.                                                              |
| wt                                         | SaPIbov2 | 2      | No mutations.                                                              |
| wt                                         | SaPIbov2 | 3      | No mutations.                                                              |
| wt                                         | SaPIbov2 | 4      | No mutations.                                                              |

<sup>a</sup>GenBank accession number for SaPIbov1: AF217235.

<sup>b</sup>GenBank accession number for SaPIbov2: AY220730.
