# Supplementary material for: Virus Satellites Drive Viral Evolution and Ecology
Source: PubMed Central journal article supplement (PMC4619825; doi:10.1371/journal.pgen.1005609), 2015-10-23
Supplement: pgen.1005609.s010.pdf [file pgen.1005609.s010.pdf]

| Sequenced phage | Xis mutation |
|-----------------|--------------|
| 1               | M1R          |
| 2               | W43*         |
| 3               | M1*          |
