# Supplementary material for: Virus Satellites Drive Viral Evolution and Ecology
Source: PubMed Central journal article supplement (PMC4619825; doi:10.1371/journal.pgen.1005609), 2015-10-23
Supplement: pgen.1005609.s011.pdf [file pgen.1005609.s011.pdf]

| Strains | Description                                                                                               | Reference  |
|---------|-----------------------------------------------------------------------------------------------------------|------------|
| RN4220  | <i>Staphylococcus aureus</i> . Restriction-defective derivative of RN450                                  | Lab strain |
| RN10359 | RN450 lysogenic for 80 $\alpha$                                                                           | Lab strain |
| JP10977 | <i>Enterococcus faecalis</i> V583 cured of its plasmids                                                   | [3]        |
| JP10983 | $\phi$ 1, $\phi$ 3, $\phi$ 4, $\phi$ 5, $\phi$ 6 and $\phi$ 7 deletion in JP10977                         | [3]        |
| JP10982 | JP10983 EfCIV583-positive                                                                                 | [3]        |
| JP10984 | JP10983 lysogenic for $\phi$ 1                                                                            | [3]        |
| JP1996  | RN4220 SaPIbov1 <i>tst::tetM</i>                                                                          | [4]        |
| JP2129  | RN4220 SaPIbov2 <i>bap::tetM</i>                                                                          | [5]        |
| JP2966  | RN4220 SaPI1 <i>tst::tetM</i>                                                                             | [4]        |
| JP3603  | RN10359 SaPIbov1 <i>tst::tetM</i>                                                                         | [6]        |
| JP6764  | RN10359 SaPIbov2 <i>tst::tetM</i>                                                                         | [6]        |
| JP7582  | RN4220 $\phi$ 80 $\alpha$ Dut E55*; ORF15 A38E; Sri C13F                                                  | This study |
| JP7587  | RN4220 $\phi$ 80 $\alpha$ Dut I75N; ORF15 T62P; Sri G10983A                                               | This study |
| JP8616  | RN4220 $\phi$ 80 $\alpha$ Dut G164S; ORF15 E40*; Sri C13Y                                                 | This study |
| JP8615  | RN4220 $\phi$ 80 $\alpha$ Dut A insertion 13931; ORF15 S32P; Sri E24*                                     | This study |
| JP8361  | RN4220 $\phi$ 55-2                                                                                        | This study |
| JP8362  | RN4220 $\phi$ 55-3                                                                                        | This study |
| JP7583  | RN4220 $\phi$ 80 $\alpha$ Dut I75N; ORF15 Q3*; $\Delta$ sri                                               | This study |
| JP9354  | JP7583 SaPIbov1 <i>tst::tetM</i>                                                                          | This study |
| JP12774 | JP7583 SaPIbov2 <i>tst::tetM</i>                                                                          | This study |
| JP11389 | RN4220 $\phi$ 80 $\alpha$ Dut S63I; ORF15 A38E; Sri G10983A                                               | This study |
| JP12767 | JP11389 SaPIbov1 <i>tst::tetM</i>                                                                         | This study |
| JP12768 | JP11389 SaPIbov2 <i>tst::tetM</i>                                                                         | This study |
| JP12829 | JP11389 SaPIbov1 <i>tst::tetM</i> A deleted from position 14611                                           | This study |
| JP12929 | JP11389 SaPIbov1 <i>tst::tetM</i> A deleted from position 14119                                           | This study |
| JP12930 | JP11389 SaPIbov1 <i>tst::tetM</i> StI M7I                                                                 | This study |
| JP12931 | JP11389 SaPIbov1 <i>tst::tetM</i> A deleted from position 14303                                           | This study |
| JP12830 | JP11389 SaPIbov2 <i>tst::tetM</i> $\Delta$ stI. Residues N122-K168 eliminated                             | This study |
| JP12953 | JP11389 SaPIbov2 <i>tst::tetM</i> StI G110R                                                               | This study |
| JP12954 | JP11389 SaPIbov2 <i>tst::tetM</i> StI carrying a C-terminal mutation. The last K* is substituted by PES*. | This study |
| JP12831 | JP7583 SaPIbov1 <i>tst::tetM</i> A deleted from position 14119                                            | This study |
| JP12932 | JP7583 SaPIbov1 <i>tst::tetM</i> StI Q150*                                                                | This study |

| Strains   | Description                                                                                                    | Reference  |
|-----------|----------------------------------------------------------------------------------------------------------------|------------|
| JP12933   | JP7583 SaPIbov1 <i>tst::tetM</i> T inserted in position 14373                                                  | This study |
| JP12934   | JP7583 SaPIbov1 <i>tst::tetM</i> A inserted in position 14454                                                  | This study |
| JP13000   | JP7583 SaPIbov2 <i>tst::tetM</i> T deleted from position 23963                                                 | This study |
| JP12956   | JP7583 SaPIbov2 <i>tst::tetM</i> StI C-terminal mutation. The last EIDKYLK* residues are substituted by AQSKL* | This study |
| JP12848   | RN4220 SaPIbov1 <i>tst::tetM</i> A deleted from position 14303                                                 | This study |
| JP12846   | RN4220 SaPIbov2 <i>tst::tetM</i> $\Delta$ stI. Residues N122-K168 eliminated                                   | This study |
| JP8059    | RN450 $\Delta$ spa SaPIbov1 <i>tst::tetM</i>                                                                   | This study |
| JP8116    | JP8059 pCN51-3xflag- <i>dut</i> $\phi$ 11 (with RBS from phage 80 $\alpha$ )                                   | This study |
| JP8117    | JP8059 pCN51-3xflag- <i>dut</i> 80 $\alpha$                                                                    | This study |
| JP8691    | JP8059 pCN51-3xflag- <i>dut</i> 80 $\alpha$ G164S                                                              | This study |
| JP8938    | JP8059 pCN51-3xflag- <i>dut</i> 80 $\alpha$ I75N                                                               | This study |
| JP8940    | JP8059 pCN51-3xflag- <i>dut</i> 80 $\alpha$ A32T                                                               | This study |
| JP10376   | JP8059 pCN51-3xflag- <i>dut</i> B2 (with RBS from phage 80 $\alpha$ )                                          | This study |
| JP10531   | JP8059 pCN51-3xflag- <i>dut</i> $\phi$ Saov3 (with RBS from phage 80 $\alpha$ )                                | This study |
| BL21(DE3) | <i>E. coli</i> expression strain                                                                               | Stratagene |
| JP10635   | BL21(DE3) pET28a- <i>dut</i> 80 $\alpha$ I75N                                                                  | This study |
| JP10636   | BL21(DE3) pET28a- <i>dut</i> 80 $\alpha$ G164S                                                                 | This study |
| JP10637   | BL21(DE3) pET28a- <i>dut</i> 80 $\alpha$ A32T                                                                  | This study |
| JP10641   | BL21(DE3) pET28a- <i>dut</i> B2                                                                                | This study |

<sup>a</sup>GenBank accession number for SaPIbov1: AF217235.

<sup>b</sup>GenBank accession number for SaPIbov2: AY220730.
