# Supplementary material for: Virus Satellites Drive Viral Evolution and Ecology
Source: PubMed Central journal article supplement (PMC4619825; doi:10.1371/journal.pgen.1005609), 2015-10-23
Supplement: pgen.1005609.s012.pdf [file pgen.1005609.s012.pdf]

| Plasmid | Description                                              | Reference  |
|---------|----------------------------------------------------------|------------|
| pCN51   | Expression vector                                        | [7]        |
| pET-28a | Expression vector                                        | Novagen    |
| pJP821  | pCN51-3xflag- <i>dut</i> 80 $\alpha$                     | [6]        |
| pJP1111 | pCN51-3xflag- <i>dut</i> 80 $\alpha$ I75N                | This study |
| pJP1113 | pCN51-3xflag- <i>dut</i> 80 $\alpha$ A32T                | This study |
| pJP1553 | pCN51-3xflag- <i>dut</i> 80 $\alpha$ G164S               | This study |
| pJP813  | pCN51-3xflag- <i>dut</i> $\phi$ 11 (RBS 80 $\alpha$ )    | This study |
| pJP1657 | pCN51-3xflag- <i>dut</i> $\phi$ Saov3 (RBS 80 $\alpha$ ) | This study |
| pJP1658 | pCN51-3xflag- <i>dut</i> B2 (RBS 80 $\alpha$ )           | This study |
| pJP1655 | pET28a- <i>dut</i> $\phi$ 80 $\alpha$ I75N               | This study |
| pJP1562 | pET28a- <i>dut</i> $\phi$ 80 $\alpha$ G164S              | This study |
| pJP1563 | pET28a- <i>dut</i> $\phi$ 80 $\alpha$ A32T               | This study |
| pJP1656 | pET28a- <i>dut</i> B2                                    | This study |
