# Supplementary material for: Virus Satellites Drive Viral Evolution and Ecology
Source: PubMed Central journal article supplement (PMC4619825; doi:10.1371/journal.pgen.1005609), 2015-10-23
Supplement: pgen.1005609.s013.pdf [file pgen.1005609.s013.pdf]

| Plasmid                                  | Oligonucleotides       | Sequence (5'-3')                                                                                         |
|------------------------------------------|------------------------|----------------------------------------------------------------------------------------------------------|
| pJP821<br>pJP1111<br>pJP1113             | Orf-32-phi80alpha-18mS | ACGCGT <u>CGAC</u> ATTATGGCAGGTCAAGTTGTCTATAAAATAT<br>GAGGAGGAATAGGAAAATGGATTATAAAGATCACGATGG            |
|                                          | Orf-32-phi80alpha-17m  | ATGGATTATAAAGATCACGATGGCGATTATAAAGATCACG<br>ATATCGATTATAAAGATGATGATGATAAAAATGACTAACACA<br>TTACAAGTAAAAAC |
|                                          | Orf32phi80alpha-2cB    | CGCGGAT <u>CCT</u> CACCAAAACCTCCTTGACTC                                                                  |
| pJP813                                   | Orf-32-phi80alpha-18mS | ACGCGT <u>CGAC</u> ATTATGGCAGGTCAAGTTGTCTATAAAATAT<br>GAGGAGGAATAGGAAAATGGATTATAAAGATCACGATGG            |
|                                          | orf25-phi11-35m        | ATGGATTATAAAGATCACGATGGCGATTATAAAGATCACG<br>ATATCGATTATAAAGATGATGATGATAAAAATGACTAACACA<br>TTACAAGTAAGG   |
|                                          | Orf25phi11-5cB         | CGCGGAT <u>CCT</u> TGACTCGATCTAAGATGTC                                                                   |
| pJP1657                                  | Orf-32-phi80alpha18mS  | ACGCGT <u>CGAC</u> ATTATGGCAGGTCAAGTTGTCTATAAAATAT<br>GAGGAGGAATAGGAAAATGGATTATAAAGATCACGATGG            |
|                                          | dut-ED133-3xflag-1m    | ATGGATTATAAAGATCACGATGGCGATTATAAAGATCACG<br>ATATCGATTATAAAGATGATGATGATAAAAATGACTAACATC<br>CTACAAGTG      |
|                                          | dut-ED133-2cB          | CGCGGAT <u>CCT</u> TGACCTTATCTAATATGTC                                                                   |
| pJP1658                                  | Orf-32-phi80alpha18mS  | ACGCGT <u>CGAC</u> ATTATGGCAGGTCAAGTTGTCTATAAAATAT<br>GAGGAGGAATAGGAAAATGGATTATAAAGATCACGATGG            |
|                                          | Orf-32-phi80alpha-17m  | ATGGATTATAAAGATCACGATGGCGATTATAAAGATCACG<br>ATATCGATTATAAAGATGATGATGATAAAAATGACTAACACA<br>TTACAAGTAAAAAC |
|                                          | dut-BII-1cB            | CGCGGAT <u>CCT</u> AACACTCCGCTACTTCCGAAGCCTTTTTTC                                                        |
| pJP1562<br>pJP1563<br>pJP1655<br>pJP1656 | Orf32-phi80alpha-12mB  | CGCGGAT <u>CCT</u> ATGACTAACACATTACAAGTAAAAAC                                                            |
|                                          | Orf32-phi80alpha-13cS  | ACGCGT <u>CGACT</u> CCTTACTCCGCTACTTCC                                                                   |

\*Underlined is shown the sequence recognized by the restriction enzymes used.

| SaPI inducers<br>(PCR amplification)       | Oligonucleotides  | Sequence (5'-3')                          |
|--------------------------------------------|-------------------|-------------------------------------------|
| <i>dut</i> 80α                             | Orf32-phi80α-1mS  | ACGCGT <u>CGAC</u> GAACTTGATGAAACAGTAGGG  |
|                                            | Orf32- phi80α-2cB | CGCGGAT <u>CCT</u> CACCAAAACCTCCTTGACTC   |
| ORF15 80α                                  | Orf15-phi80α-7mB  | CGCGGAT <u>CCT</u> AATTAAGTATGATGATGATGG  |
|                                            | Orf15- phi80α-8cK | CGGGTACCTTCAGTCATGTTCTACCTCC              |
| <i>sri</i> 80α                             | Orf22-phi80α-4mB  | CGCGGAT <u>CCT</u> CAAGTAAGAGTAATCGGAGACG |
|                                            | Orf22- phi80α-5cE | CCGGAATTCCTTTCGGCAATTTTTAACACTCC          |
| <i>sri</i> φ55-2                           | Orf103phi55-8m    | GATACGATCATAACTATTTGG                     |
|                                            | Orf103phi55-9c    | GCAAGTTTTTGGATAAATAGG                     |
| <i>sri</i> φ55-3                           | Orf103phi55-6m    | TGAGGATTCTAAAGGTTTTCC                     |
|                                            | Orf103phi55-7c    | TTTCTCTTGGTCTCCGTTTGC                     |
| Flanking divergent<br>region φ55-2φ / 55-3 | Orf103phi55-5m    | ACATCATAACCAGCAACATGC                     |
|                                            | Orf103-phi55-1c   | CTTAATATTCGACGATAGCGG                     |

| Southern blot                 | Oligonucleotides            | Sequence (5'-3')                           |
|-------------------------------|-----------------------------|--------------------------------------------|
| SaPI <sub>bov1</sub><br>probe | SaPI <sub>bov1</sub> -112mE | CCGGAATTCAATTGCTGAGGCAA <del>AA</del> CTTC |
|                               | SaPI <sub>bov1</sub> -113cB | CGCGGATCCTAATTCTCCACGTCTAAAGC              |

## References

1. Zhang J, Rosenberg HF, Nei M (1998) Positive Darwinian selection after gene duplication in primate ribonuclease genes. *Proc Natl Acad Sci USA* 95: 3708–3713.
2. Tamura K, Peterson D, Peterson N, Stecher G, Nei M, et al. (2011) MEGA5: molecular evolutionary genetics analysis using maximum likelihood, evolutionary distance, and maximum parsimony methods. *Mol Biol Evol* 28: 2731–2739.
3. Matos RC, Lapaque N, Rigottier-Gois L, Debarbieux L, Meylheuc T, et al. (2013) *Enterococcus faecalis* prophage dynamics and contributions to pathogenic traits. *PLoS Genet* 9: e1003539.
4. Ubeda C, Maiques E, Barry P, Matthews A, Tormo MA, et al. (2008) SaPI mutations affecting replication and transfer and enabling autonomous replication in the absence of helper phage. *Mol Microbiol* 67: 493–503. d
5. Maiques E, Ubeda C, Tormo MA, Ferrer MD, Lasa I, et al. (2007) Role of staphylococcal phage and SaPI integrase in intra- and interspecies SaPI transfer. *J Bacteriol* 189: 5608–5616.
6. Tormo-Más MÁ, Mir I, Shrestha A, Tallent SM, Campoy S, et al. (2010) Moonlighting bacteriophage proteins derepress staphylococcal pathogenicity islands. *Nature* 465: 779–782.
7. Charpentier E, Anton AI, Barry P, Alfonso B, Fang Y, et al. (2004) Novel cassette-based shuttle vector system for gram-positive bacteria. *Appl Environ Microbiol* 70: 6076–6085.
